# Supplementary material for: A mesoporous cationic thorium-organic framework that rapidly traps anionic persistent organic pollutants
Source: PubMed Central journal article supplement (PMC5677036; doi:10.1038/s41467-017-01208-w), 2017-11-07
Supplement: 41467_2017_1208_MOESM2_ESM.pdf [file 41467_2017_1208_MOESM2_ESM.pdf]

## **Description of Additional Supplementary Files**

File Name: Supplementary Data 1

Description: Cif file for title compound SCU-8.
